RESEARCH ARTICLE

# Discovery of a new family of relaxases in Firmicutes bacteria

Gayetri Ramachandran<sup>1☯<sup>aa</sup></sup>, Andrés Miguel-Arribas<sup>1☯</sup>, David Abia<sup>1☯</sup>, Praveen K. Singh<sup>1<sup>ab</sup></sup>, Isidro Crespo<sup>2</sup>, César Gago-Córdoba<sup>1</sup>, Jian An Hao<sup>1<sup>ac</sup></sup>, Juan Roman Luque-Ortega<sup>3</sup>, Carlos Alfonso<sup>3</sup>, Ling J. Wu<sup>4</sup>, D. Roeland Boer<sup>2</sup>, Wilfried J. J. Meijer<sup>1\*</sup>

**1** Centro de Biología Molecular "Severo Ochoa" (CSIC-UAM), Instituto de Biología Molecular "Eladio Viñuela" (CSIC), Universidad Autónoma, Canto Blanco, Madrid, Spain, **2** XALOC beamline, ALBA synchrotron Light Source, Cerdanyola del Vallès, Barcelona, Spain, **3** Centro de Investigaciones Biológicas (CSIC), Madrid, Spain, **4** Centre for Bacterial Cell Biology, Institute for Cell and Molecular Biosciences, Newcastle University, Newcastle Upon Tyne, United Kingdom

☯ These authors contributed equally to this work.

<sup>aa</sup> Current address: Institute Pasteur, Synthetic Biology (G-5), Paris, France

<sup>ab</sup> Current address: Max Planck Institute for Terrestrial Microbiology, Marburg, Germany

<sup>ac</sup> Current address: The Institute of Seawater Desalination and Multipurpose Utilization, SOA, Tianjin, China

\* [wmeijer@cbl.csic.es](mailto:wmeijer@cbl.csic.es)

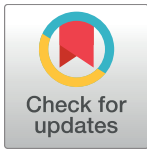

**OPEN ACCESS**

**Citation:** Ramachandran G, Miguel-Arribas A, Abia D, Singh PK, Crespo I, Gago-Córdoba C, et al. (2017) Discovery of a new family of relaxases in Firmicutes bacteria. *PLoS Genet* 13(2): e1006586. doi:10.1371/journal.pgen.1006586

**Editor:** Diarmaid Hughes, Uppsala University, SWEDEN

**Received:** June 9, 2016

**Accepted:** January 16, 2017

**Published:** February 16, 2017

**Copyright:** © 2017 Ramachandran et al. This is an open access article distributed under the terms of the [Creative Commons Attribution License](https://creativecommons.org/licenses/by/4.0/), which permits unrestricted use, distribution, and reproduction in any medium, provided the original author and source are credited.

**Data Availability Statement:** All relevant data are within the paper and its Supporting Information files.

**Funding:** Work in the Meijer lab was funded by the Spanish government through grant Bio2013-41489-P of the Ministry of Economy and Competitiveness, and through grant Bio2016-77883-C2-1-P of the Ministry of Economy, Industry and Competitiveness; the former grant also funded AMA and CGC. The Spanish government also supported DRB, JRLO, and CA. DRB was funded by grant Bio2016-77883-C2-2-P

## Abstract

Antibiotic resistance is a serious global problem. Antibiotic resistance genes (ARG), which are widespread in environmental bacteria, can be transferred to pathogenic bacteria via horizontal gene transfer (HGT). Gut microbiomes are especially apt for the emergence and dissemination of ARG. Conjugation is the HGT route that is predominantly responsible for the spread of ARG. Little is known about conjugative elements of Gram-positive bacteria, including those of the phylum Firmicutes, which are abundantly present in gut microbiomes. A critical step in the conjugation process is the relaxase-mediated site- and strand-specific nick in the *oriT* region of the conjugative element. This generates a single-stranded DNA molecule that is transferred from the donor to the recipient cell via a connecting channel. Here we identified and characterized the relaxosome components *oriT* and the relaxase of the conjugative plasmid pLS20 of the Firmicute *Bacillus subtilis*. We show that the relaxase gene, named *rel<sub>LS20</sub>*, is essential for conjugation, that it can function *in trans* and provide evidence that Tyr26 constitutes the active site residue. *In vivo* and *in vitro* analyses revealed that the *oriT* is located far upstream of the relaxase gene and that the nick site within *oriT* is located on the template strand of the conjugation genes. Surprisingly, the Rel<sub>LS20</sub> shows very limited similarity to known relaxases. However, more than 800 genes to which no function had been attributed so far are predicted to encode proteins showing significant similarity to Rel<sub>LS20</sub>. Interestingly, these putative relaxases are encoded almost exclusively in Firmicutes bacteria. Thus, Rel<sub>LS20</sub> constitutes the prototype of a new family of relaxases. The identification of this novel relaxase family will have an important impact in different aspects of future research in the field of HGT in Gram-positive bacteria in general, and specifically in the phylum of Firmicutes, and in gut microbiome research.

of the Ministry of Economy, Industry and Competitiveness, and JRL0 and CA were supported by grant BFU2014-52070-C2-2-P of the Ministry of Economy and Competitiveness to CA. LJW's work was supported by Wellcome Trust grant WT098374AIA to Jeff Errington. PKS was holder of a JaePre fellowship from the Spanish Research Council (CSIC). JAH received a State Scholarship Fund from the China Scholarship Council. The funders had no role in study design, data collection and analysis, decision to publish, or preparation of the manuscript.

**Competing Interests:** The authors have declared that no competing interests exist.

## Author summary

Antibiotics have saved the lives of millions. However, the emergence and spread of antibiotic resistance compromises the effectiveness of antibiotics. Genes conferring antibiotic resistance are often located on genetic elements that can be transferred to other bacteria. Conjugation is the predominant route responsible for spreading antibiotic resistance genes, and depends critically on a class of proteins called relaxases. These enzymes initiate conjugation by processing the DNA of the mobile element and are therefore an Achilles' heel of the conjugation process. Although antibiotic resistance is an important health threat in both Gram-negative and Gram-positive bacteria, conjugation has so far been studied primarily in Gram-negative bacteria. Due to the extremely high concentration of bacteria, which favors conjugation, the intestinal gut is a hotspot for spreading antibiotic resistance. It is now known that a large part of the gut microbiome corresponds to Gram-positive bacteria, and many of these belong to the phylum Firmicutes. To better understand conjugation and specifically relaxases of Gram-positive conjugative elements we have identified and characterized the relaxase and the DNA region at which it acts of the conjugative plasmid pLS20 from the Gram-positive Firmicute *Bacillus subtilis*. We also show that the relaxase of pLS20 is the founding member of a new and large family of relaxases that is almost exclusively present in Firmicutes bacteria. This work will have important implications for the transfer of genes in Gram-positive bacteria in general and specifically for conjugation-mediated spread of antibiotic resistance in Firmicutes bacteria of the intestinal gut.

## Introduction

Horizontal gene transfer (HGT) processes are responsible for the spread of antibiotic resistance ( $Ab^R$ ) which poses a serious economic and health problem worldwide. Conjugation, which is the process by which a DNA element is actively transferred from a donor cell to a recipient cell through a dedicated transportation pore connecting the cells, is the main HGT route responsible for spreading  $Ab^R$  genes [1–4]. Conjugative elements can be embedded in a bacterial chromosome or they can be present on plasmids. Several aspects of conjugation have been studied in considerable depth over the last few decades. However, most conjugation studies concern Gram-negative (G-) bacteria. Recent studies provide evidence that the gut microbiome of humans and animals functions as a pool of  $Ab^R$  genes [5–9]. Bacteria from diverse environments and from food enter the gut, and the enormous numbers and density of microbes in the gut favors HGT, especially conjugation. The gut microbiome contains both G- and Gram-positive (G+) bacteria. A large fraction of the G+ bacteria of the gut microbiome belong to the phylum of Firmicutes [10]. Moreover, Firmicutes constitute a large fraction of the microbiota of fermented foods, many of which also thrive in the gut, and for which it has been shown that they can harbor  $Ab^R$  genes [11]. Together, this illustrates the need to better understand the biology of plasmid-mediated conjugation in G+ bacteria in general, and in the phylum of Firmicutes in particular.

We have been studying the low-copy number conjugative plasmid pLS20, originally isolated from the Firmicutes bacterium *B. subtilis natto* strain IFO3335 that is used in the fermentation of soybeans to produce “natto”, a popular dish in South Asia [12]. pLS20 is known to be conjugative in liquid media as well as on solid media [13–15]. The replication region of pLS20 has been determined [16] and is flanked at its right side by three genes that are involved in

regulating the expression of the large conjugation operon that is located immediately downstream of these three genes [17,18].

The basis of the conjugation process is conserved in plasmids of G+ and G- bacteria [19–21]. Thus, in most cases, only one DNA strand, called the T-strand, is transferred into the recipient cell through a sophisticated, multi-component pore, -a type IV secretion system (T4SS)-, that connects the donor and recipient cells. Initiation of the generation of the T-strand and its delivery to the pore involves a specific nucleoprotein complex, called the relaxosome. The pivotal component of the relaxosome is a relaxase that recognizes and binds to specific sequences within a region of several hundred base pairs on the plasmid named the origin of transfer (*oriT*). Often, the *oriT* region is also recognized by auxiliary proteins, which are generally encoded by the plasmid but can also involve host-encoded proteins [for review see, 21]. The relaxase cleaves the DNA in a strand- and site-specific manner at a specific position called the *nic* site within the *oriT* region. The generated hydroxyl group at 3'-end of the nick site functions as a primer for DNA elongation. Upon nicking, the relaxase remains covalently attached to the 5'-end of the nicked T-strand via a tyrosine residue, and this complex is delivered to the so called T4 Coupling Protein (T4CP) that is located at the cytoplasmic side of the transferosome and which is actively involved in the transfer of the relaxase and the attached T-strand into the recipient cell. Besides conjugative plasmids, there is a group of plasmids that lack the T4SS but contain a relaxase gene and an *oriT*, and sometimes auxiliary relaxosome genes. These plasmids, called mobilizable plasmids, can be transferred to recipient cells when they are co-resident with a conjugative plasmid that provides the T4SS.

The essential role of relaxases in the transfer of plasmids and other conjugative elements gain them much attention and several relaxases have been studied at the functional, biochemical and structural level. In addition, they have been chosen as a target to develop drugs interfering with its activity [22]. Based on their relationship, relaxases have been classified into six families [23,24]. However, as for other aspects of conjugation, most of our knowledge on conjugative relaxases is based on those that are encoded by mobilizable or conjugative plasmids of G- origin, or those on mobilizable plasmids of G+ origin [23,24].

Here we describe the identification of relaxosome components of the *B. subtilis* plasmid pLS20. Contrary to many other plasmids, the relaxosome components of pLS20 are located within its large conjugation operon. We identified the relaxase gene of pLS20cat, which we name *rel<sub>LS20</sub>*, and showed that it is essential for conjugation. We also defined the minimal functional *oriT* region of pLS20cat, *oriT<sub>LS20</sub>*, and demonstrate that it contains a pronounced static bent. We then demonstrated that Rel<sub>LS20</sub> has nicking-activity and determined the nick site in *oriT<sub>LS20</sub>*. Interestingly, Rel<sub>LS20</sub> shows only very limited homology with known relaxases and cannot be classified into one of the six existing relaxase families. Importantly, we found that more than 800 deduced proteins present in public databases for which no function had been attributed, and which are almost all encoded by bacteria belonging to the phylum of Firmicutes, show significant homology with Rel<sub>LS20</sub>. Most probably, many or all of these proteins are relaxases, and hence Rel<sub>LS20</sub> constitutes the prototype of a new family of relaxases that we name MOB<sub>L</sub>. Thus, besides important progress in the understanding of the relaxosome components of pLS20, our studies have important implications for a large number of related relaxases within the phylum Firmicutes.

## Results

### Identification of putative relaxase gene of pLS20cat by *in silico* analysis

Putative function(s) of newly sequenced genes are commonly assigned based upon similarity of the entire or partial region(s) of the deduced protein sequence to proteins, protein domains

or signatures present in the conserved domain database (CDD) of the NCBI [25]. Surprisingly, none of the deduced pLS20cat proteins was identified as being a putative relaxase after searching pLS20cat against the CDD. We therefore screened all the putatively encoded proteins of pLS20cat for the presence of one or more motifs that are distinctive of relaxases previously described and classified into six MOB families, MOB<sub>P</sub>, MOB<sub>Q</sub>, MOB<sub>F</sub>, MOB<sub>C</sub>, MOB<sub>H</sub> and MOB<sub>V</sub> [23,24], considering that these motifs could include sequences that are not covered by the twelve relaxase-specific motifs present in the CDD. Generally, these motifs concern regions that have a crucial role in the enzymatic activity of the protein. For instance, motif I and III correspond respectively to regions that contain the catalytically active tyrosine(s), and the three histidines essential for coordinating a divalent metal ion [24]. This screening led to the identification of one candidate, gene 58, as a potential relaxase gene. Interestingly, unlike many other conjugative plasmids, the pLS20 putative relaxase gene is not located adjacent to the gene predicted to encode T4CPs [24], pLS20cat gene 48.

Although the overall similarity is limited, a stretch of 17 amino acids (residues 147–163) of the deduced protein p58 sequence showed similarity to part of motifs III present in many relaxases. Relaxase motif III embraces the “HUH” sequence that is characteristic of the HUH endonuclease superfamily, which includes many relaxases [26]. The “HUH” sequence is essential for enzymatic activity of the protein. Within the HUH motif the “U” represents a bulky hydrophobic residue, and “H” a Histidine. The two His residues in this motif correspond to two of the three ligands that coordinate a divalent metal ion that is required for the enzymatic nicking-closing activity. In the case of relaxases, the third ligand is often also a Histidine. This third His residue is located near the HUH motif in the primary sequence and is included in the motif III of relaxases, which therefore is also referred to as the 3H motif. Thus, except those belonging to the MOB<sub>H</sub> or MOB<sub>C</sub> family, all other relaxases contain a motif III [24]. Fig 1 shows the similarity between residues 141–171 of the deduced pLS20cat protein p58 and the consensus sequences of motif III regions present in relaxases belonging to the MOB<sub>P</sub>, MOB<sub>Q</sub> and MOB<sub>V</sub> families. Interestingly, no significant similarity exists between p58 and the consensus sequence of motif III of the MOB<sub>F</sub> type relaxases (see Discussion). In summary, *in silico* analyses suggested that pLS0cat gene 58 may encode a relaxase.

### pLS20cat gene 58 is the prototype of a new family of genes whose orthologs are widespread in Firmicutes bacteria

If pLS20cat gene 58 indeed encodes for a relaxase then it could be the founding member of a novel relaxase family. To test this possibility we performed a psi-blastp search of the NCBI nr database using the deduced protein p58 sequence as a query (see Materials and methods for details). After removing redundant sequences this search resulted in the identification of 817 hits showing significant similarity with putative pLS20cat protein p58 (threshold E-value  $1e-15$ , see S1 Table for a list of these hits). Interestingly, almost all of the identified sequences corresponded to products of (putative) genes of bacteria belonging to the phylum Firmicutes (99.6% Firmicutes, 0.1% bacteriodes, 0.1% tenericutes and 0.1% undefined). The vast majority (99.6%) of these hits were designated as hypothetical protein. However, three hits were labelled as (putative) relaxase: WP\_014386599.1 (putative relaxase of *Lactococcus garvieae* 21881 plasmid pGL5 [28]), WP\_008381272.1 (putative relaxase of *Enterococcus* sp. C1 [29]), and WP\_011377372.1 (putative relaxase of *Enterococcus faecium* plasmid pHT $\beta$  [30]). In the latter case, genetic evidence suggests that the corresponding gene may encode the relaxase of plasmid pHT $\beta$ . Firstly, these observations lend further support to the view that pLS20cat gene 58 encodes a relaxase. Based on this and on results described below we name gene 58 *rel*<sub>LS20</sub>. Secondly, these observations provide evidence that Rel<sub>LS20</sub> is the prototype of a large, new

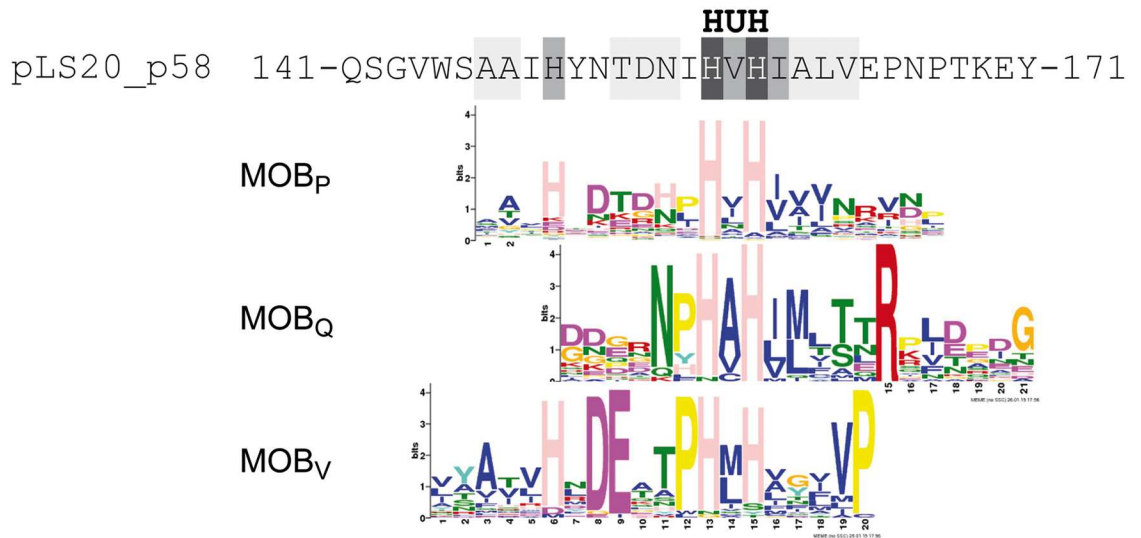

**Fig 1. A 17 residue region of the deduced protein sequence of pLS20cat gene 58 shows similarity to the motif III regions of MOB<sub>p</sub>, MOB<sub>q</sub> and MOB<sub>v</sub> type relaxases.** pLS20cat has been sequenced independently in our lab and in the lab of M. Itaya (Keio University, Japan) who deposited the sequence in public databases where it was given the accession number NC\_015148.1. pLS20cat protein p58, according to our nomenclature, has been assigned the accession number YP\_004243525.1. Residues 141–171 of the deduced pLS20cat protein p58 are aligned with the consensus sequences, represented as Weblogos, of the motif III region of relaxases belonging to the MOB<sub>p</sub>, MOB<sub>q</sub> and MOB<sub>v</sub> family. The consensus sequence of the motif III regions of the published relaxases of each MOB family [24] was identified here with the motif-identification program MEME [27]. The position of the HUH signature is given at the top. Residues of the deduced pLS20cat p58 sequence are highlighted against a light grey, dark grey and black background when they are conserved with respect to the consensus sequence present in one, two or three of the MOB families, respectively.

doi:10.1371/journal.pgen.1006586.g001

family of relaxases, which we name MOB<sub>L</sub>, and which contains over 800 members that are almost exclusively encoded by Firmicutes bacteria.

We next performed additional analyses to gain insights into the evolutionary relationship between the newly identified MOB<sub>L</sub> family of relaxases and the previously described relaxase families. The motif-identification program MEME [27] was used to identify up to 10 conserved motifs in sequences of the MOB<sub>L</sub> members (E-value < 1e-15, for details see [Materials and methods](#)). To discriminate the motifs identified in our work from those described previously for the six MOB families [24], we refer to the MEME motifs determined in this work as signatures. Weblogo presentations of the ten identified signatures of the MOB<sub>L</sub> type relaxases are shown in [S1A Fig](#). The positions of the signatures in the Rel<sub>LS20</sub> primary sequence are given in [S1B Fig](#).

Similarly, we analysed the relaxases of the six previously defined MOB families and identified up to ten signatures in each family (see [S2 Fig](#)). We then used the Motif Alignment and Search Tool (MAST) of the MEME suite to determine the presence of (i) MOB<sub>L</sub> signatures in the relaxases of the other six MOB families ([S2 Table](#)), and (ii) signatures of those six MOB families in members of the MOB<sub>L</sub> family ([S3 Table](#)). None of the MOB<sub>L</sub> signatures were detected in members of the MOB<sub>C</sub> and MOB<sub>H</sub> families. As explained above, MOB<sub>L</sub> signature 1 -containing the conserved histidines-, shares similarity with motif III regions of MOB<sub>q</sub>, MOB<sub>v</sub> and MOB<sub>p</sub> type relaxases (see [Fig 1](#)). Not surprisingly therefore, the MOB<sub>L</sub> signature 1 was detected in a substantial number of relaxases of these MOB families but not in the members of the other three families. Importantly, other MOB<sub>L</sub> signatures were either not detected or detected in only a limited number of relaxases from the six existing MOB families (see [S2 Table](#)). A similar tendency was observed in the reciprocal analyses (see [S3 Table](#)). Cross

detection of signatures was most frequently observed between the MOB<sub>L</sub> and MOB<sub>P</sub> families. Altogether, these data corroborate the view that Rel<sub>LS20</sub> and the identified related (putative) proteins constitute a new MOB family, and that MOB<sub>L</sub> is closest related to the MOB<sub>P</sub> family of relaxases.

## Members of the MOB<sub>L</sub> family can be divided into two clades

Rel<sub>LS20</sub> contains eight out of the ten MOB<sub>L</sub> signatures (S1B Fig). Most other MOB<sub>L</sub> members also contain most but not all MOB<sub>L</sub> signatures, indicating that the MOB<sub>L</sub> family is composed of different clades. To test this statistically we calculated a phylogenetic tree using neighbor-joining analysis, applying bootstrap values of 1000 replicates (see [Materials and methods](#), S3 Fig). The phylogenetic tree obtained shows that the MOB<sub>L</sub> members can be divided into two clades, and that Rel<sub>LS20</sub> belongs to clade 1.

Bioinformatic analyses were performed to study whether, besides Rel<sub>LS20</sub>, other MOB<sub>L</sub> members are encoded by a plasmid. For this we identified all circular plasmids deposited in public databases for which the complete sequence has been determined (see [Materials and methods](#)). This resulted in a database of 10,904 plasmids. Next, the sequences of the 817 MOB<sub>L</sub> relaxases were used as query to search the translated sequences of the generated plasmid database for similarity with stringent settings (>95% similarity over >80% of the entire protein sequence). This analysis indicated that at least 306 of the 817 MOB<sub>L</sub> members are located on a plasmid. Interestingly, 98% of identified plasmid-located *mob<sub>L</sub>* genes (300 genes) correspond to members classified in clade 1. Most of the DNA sequences currently present in databases was generated from metagenomic or by shotgun sequencing approaches, which do not discriminate between chromosomal or extrachromosomal DNA. It is therefore plausible that (many) more clade 1 MOB<sub>L</sub> genes are located on plasmids. To gain insight into the nature of the relaxases belonging to MOB<sub>L</sub> clade 2, we performed *in silico* analysis and manually inspected DNA regions surrounding these genes. However, we were not able to draw firm conclusions about the nature of the clade 2 MOB<sub>L</sub> members, largely because very little functional information is available about these genes.

In summary, members of the newly identified MOB<sub>L</sub> family can be subdivided into two clades and many members belonging to clade 1 are located on plasmids. Strikingly, all these genes are almost exclusively present in the phylum Firmicutes.

## pLS20cat gene 58 is essential for conjugation

Since processing of DNA to produce the T-DNA strand that is transferred into the recipient cell is a vital step in the conjugation process, it was expected that gene 58 would be essential for conjugation if it encoded the relaxase of pLS20cat. Gene 58 is translationally coupled to the preceding gene 57, which in turn is closely linked to gene 56 [17]. Therefore, we constructed a deletion derivative of pLS20cat lacking these three genes (see [Materials and methods](#)) and named the resulting plasmid pLS20Δ56–58. Next, *B. subtilis* 168 containing pLS20cat (strain PKS11) or pLS20Δ56–58 (strain GR149) were used as donor cells to determine their conjugation efficiencies using a standard protocol (see [Materials and methods](#)). The efficiency of conjugation observed for pLS20cat was in the range of 10<sup>-3</sup>, which is similar to values reported previously under these conditions [17,18]. However, no transconjugants were observed for pLS20Δ56–58 (see [Table 1](#)). These results suggested that at least one of the genes of 56 to 58 is required for conjugation. However, it was also possible that the deleted region contained the *oriT*, which is essential for conjugation. To rule out this possibility, we re-introduced genes 56–58, under the control of an IPTG-inducible P<sub>spank</sub> promoter, into strain GR149 (harbouring pLS20Δ56–58) at the *amyE* locus. As expected, no transconjugants were obtained when the resulting strain,

**Table 1. Conjugation efficiencies of pLS20cat and pLS20Δ56–58 in different backgrounds.**

| Strain | Genotype                                  | Plasmid     | Inductor | Conjugation efficiency * |
|--------|-------------------------------------------|-------------|----------|--------------------------|
| PKS11  | 168                                       | pLS20cat    | -        | $8.3 \times 10^{-3}$     |
| GR149  | 168                                       | pLS20Δ56–58 | -        | $< 10^{-7}$              |
| GR150  | 168, <i>amyE::P<sub>spank</sub> 56–58</i> | pLS20Δ56–58 | -        | $< 10^{-7}$              |
|        |                                           |             | +        | $1.4 \times 10^{-3}$     |
| GR206  | 168, <i>amyE::P<sub>spank</sub> 56–57</i> | pLS20Δ56–58 | -        | $< 10^{-7}$              |
|        |                                           |             | +        | $< 10^{-7}$              |

\*: Conjugation efficiencies are calculated as transconjugants/donor, and correspond to the mean value of at least three independent experiments. When indicated, the inductor IPTG was added at a final concentration of 1 mM.

doi:10.1371/journal.pgen.1006586.t001

GR150, was grown in the absence of IPTG. Importantly, conjugation efficiencies similar to those obtained with pLS20cat were obtained for pLS20Δ56–58 when GR150 was grown in the presence of IPTG (see Table 1). These results demonstrated therefore that one or more of the pLS20cat genes 56, 57 and 58 were required for conjugation. In addition, the results showed that (i) pLS20Δ56–58 contains a functional *oriT* that hence must be located outside the deleted DNA fragment spanning genes 56–58, and (ii) that genes 56–58 can function in *trans*.

To determine whether gene 58 is required for conjugation we constructed strain GR206 that contains genes 56 and 57 (but not 58) under the control of the *P<sub>spank</sub>* promoter at the *amyE* locus and harbouring pLS20Δ56–58. No transconjugants were obtained when this strain was used as donor in conjugation experiments, regardless of whether cells were grown in the presence or absence of IPTG. These results showed that pLS20cat gene 58 was required for conjugation, as would be expected for a relaxase gene.

### The origin of transfer region of pLS20cat, *oriT<sub>LS20</sub>*, is located upstream of gene 56 and is intrinsically bent

The results presented above show that *Rel<sub>LS20</sub>* can function in *trans*. Consequently, it was expected that pLS20cat could mobilize a compatible plasmid containing the *oriT* region of pLS20cat but lacking the relaxase gene. We used this strategy to identify the *oriT* region of pLS20cat, which we name *oriT<sub>LS20</sub>* henceforth. Thus, we engineered the *oriT* screening vector pUCTA2501 and screened derivatives containing regions of pLS20 for their ability to be mobilized by pLS20cat. As expected, the empty vector pUCTA2501 was not mobilized by pLS20cat (see Table 2). The *oriT* regions are often located upstream of the relaxase gene [21,23], and the results presented above showed that pLS20Δ56–58 contained a functional *oriT*. We therefore first tested a 1.75 kb fragment, named Fragment 1, which encompasses the 3'-region of pLS20cat gene 55 till the middle of gene 57 (see Fig 2A for a schematic representation). For this, Fragment 1 was cloned in pUCTA2501 resulting in plasmids pGR8A and pGR8B (“A” and “B” correspond to the orientation of the cloned fragment tested). As shown in Table 2 and schematically in Fig 2A, pLS20cat was able to mobilize both plasmids pGR8A and B, indicating that *oriT<sub>LS20</sub>* is located on the 1.75 kb Fragment 1. In addition, these results indicated that *Rel<sub>LS20</sub>* can act on *oriT<sub>LS20</sub>* regardless of its orientation in the plasmid. To delineate the *oriT<sub>LS20</sub>* region further several internal regions of Fragment 1 were sub-cloned into pUCTA2501 and the resulting derivatives were tested for their ability to be mobilized by pLS20cat. Using this approach the *oriT<sub>LS20</sub>* was delineated to a region of 362 bp (Fragment 6 present in vectors pGR16A/B) that corresponds to the intergenic region between genes 55–56 (see Table 2 and Fig 2A).

**Table 2. Mobilization efficiencies of *oriT*-screening vector pUCTA2501 and derivatives.**

| Strain | Plasmid <sup>§</sup> | Region cloned (bp) | Mobilization efficiency * |
|--------|----------------------|--------------------|---------------------------|
| GR104  | pUCTA2501            |                    | $< 10^{-7}$               |
| GR124  | pGR8A                | 1739               | $3.3 \times 10^{-5}$      |
| GR183  | pGR8B                | 1739               | $1.2 \times 10^{-4}$      |
| GR114  | pGR10A               | 849                | $< 10^{-7}$               |
| GR121  | pGR10B               | 849                | $< 10^{-7}$               |
| GR115  | pGR12A               | 949                | $< 10^{-7}$               |
| GR122  | pGR12B               | 949                | $< 10^{-7}$               |
| GR184  | pGR20A               | 1152               | $4.5 \times 10^{-5}$      |
| GR140  | pGR20B               | 1152               | $1.7 \times 10^{-4}$      |
| GR139  | pGR22A               | 949                | $6.8 \times 10^{-5}$      |
| GR185  | pGR22B               | 949                | $1.2 \times 10^{-4}$      |
| GR137  | pGR16A               | 362                | $2.0 \times 10^{-5}$      |
| GR138  | pGR16B               | 362                | $1.5 \times 10^{-4}$      |

<sup>§</sup>: Besides the plasmid mentioned, all strains contained pLS20cat.

\*: Mobilization efficiencies are calculated as Em-resistant transconjugants/donor using strain PS110 as recipient strain. Mobilization efficiencies are the mean value of at least three independent experiments. The “A” and “B” extensions of the pUCTA2501 derivatives reflect different orientations of the same insert.

doi:10.1371/journal.pgen.1006586.t002

The topology of DNA, including intrinsic bends, can have major effects on the function of proteins that bind or process DNA [31,32]. The *oriT* regions often contain repeated sequences, and several *oriT* regions from conjugative elements of Gram-negative bacteria have been demonstrated to contain an intrinsic bent which is believed to be important for optimal binding and functionality of the relaxosome proteins [for review see, 21]. Fig 2B shows that *oriT*<sub>LS20</sub> also contains several direct and inverted repeated sequences. *In silico* analysis of the entire pLS20cat sequence predicted the presence of a static bent near *oriT*<sub>LS20</sub> (S4 Fig). To test whether *oriT*<sub>LS20</sub> is intrinsically bent we performed circular permutation assays. Thus, eight DNA fragments, - F1-F8, each 600 bp long and corresponding to different positions of the *oriT*<sub>LS20</sub> (see Fig 2C), were generated and their migration in 2% agarose or 8% native PAA gels was tested. As expected, identical migration positions were observed when the fragments were run in agarose gel (Fig 2D). However, when run on the native PAA gel clear differences in migration were observed between the fragments, demonstrating that the *oriT*<sub>LS20</sub> region is intrinsically bent (Fig 2E). Taking into account that migration is most affected when the bent is located in the middle of a DNA fragment [33], these results suggest that the bent is located towards the 5' region of *oriT*<sub>LS20</sub>.

### Rel<sub>LS20</sub> forms monomers in solution

To characterize the relaxase of pLS20cat *in vitro*, we purified Rel<sub>LS20</sub> (Mw 50,329 Da) fused to a His<sub>(6)</sub> tag at its C-terminus from *E. coli*. We first determined its oligomerization state using two complementary analytical ultracentrifugation approaches, i.e. sedimentation velocity (SV) and sedimentation equilibrium (SE) (Fig 3), as well as dynamic light scattering (DLS) experiments using the same experimental conditions.

More than 95% of the Rel<sub>LS20</sub> absorbance in SV experiments corresponded to a narrow peak with an experimental sedimentation coefficient of 2.8 S ( $s_{20,w} = 3.3$  S), matching the theoretical behaviour of the moderately elongated protein monomer ( $f/f_0 = 1.5$ ) (Fig 3A). DLS analysis gave a D value of  $56.7 \pm 0.8 \mu\text{m}^2/\text{s}$ . Applying the obtained D and S values for Rel<sub>LS20</sub> to the



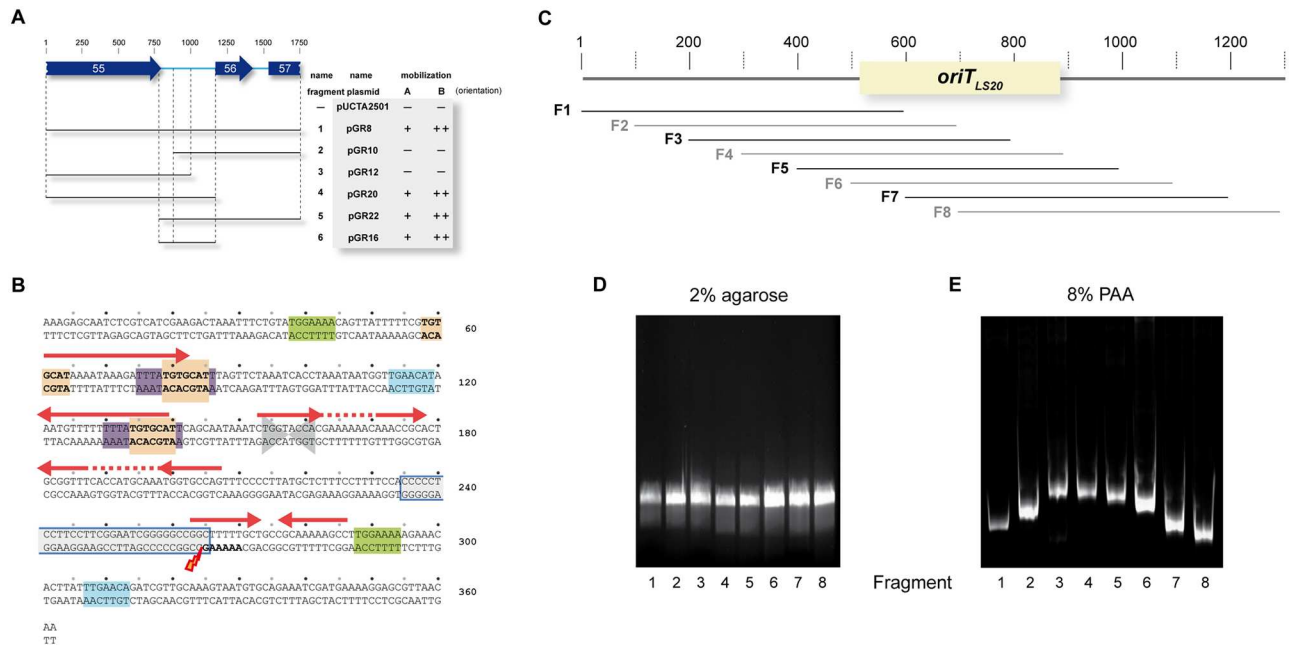

**Fig 2. Determination and characteristics of *oriT*<sub>LS20</sub>.** (A) Schematic overview of pLS20cat regions analyzed for the presence of a functional *oriT* region. The corresponding pLS20cat region and position of genes 55, 56 and 57 are presented on the top. Numbers correspond to length in base pairs. The regions cloned are indicated by horizontal bars. The names of the fragments and the plasmids, and their ability to be mobilized are indicated at the right. "A" and "B" correspond to the orientation of the cloned fragment. -, + and ++: mobilization frequencies  $< 10^{-7}$ , in the order of  $10^{-5}$ , and  $10^{-4}$ , respectively. (B) Features of the *oriT*<sub>LS20</sub> region. The sequence of the 362 bp *oriT*<sub>LS20</sub> region is presented along with identified features. Inverted repeated sequences are indicated with red arrows. Identical or nearly identical direct repeated sequences are boxed in green, orange or purple. Note that the sequence with consensus 5'-TGTGCAT-3' is present three times. The palindromic sequence 5'-TGGTACCA-3' is indicated with two converging arrowheads. The 30-bp region with a GC-content of 73% is highlighted with a blue-lined box. Numbering of the fragment is given on the right. The determined *nic* site is indicated with a lightning symbol. (C) Schematic representation of the 1,300 bp pLS20cat region containing *oriT*<sub>LS20</sub> (blue box) studied for the presence of a static bent. The lower part indicates the positions of the 600 bp DNA fragments F1 to F8 with respect to *oriT*<sub>LS20</sub>, and which were subjected to electrophoresis in gels of 2% agarose (D) or 8% native PAA (E). After electrophoresis, the agarose and PAA gels were stained with ethidium bromide.

doi:10.1371/journal.pgen.1006586.g002

Svedberg equation resulted in an apparent molecular mass of 47,760 Da, which is close to the theoretical monomer molecular mass (from amino acid composition). In SE experiments a calculated average molecular mass of  $43,200 \pm 300$  Da was obtained, a value slightly lower than the monomer molecular mass. The experimental data adjust very well to the best-fit line assuming Rel<sub>LS20</sub> being a monomer (Fig 3B). In summary, the outcome of three complementary experimental approaches showed that Rel<sub>LS20</sub> is monomeric in solution.

### Biochemical analyses of Rel<sub>LS20</sub> and determination of the *nic* site

Relaxases introduce a site- and strand-specific cut at the so-called *nic* site within the *oriT* region and remains covalently attached to the 5' end via a tyrosine residue. This results in relaxation of the covalently closed circular form of the plasmid. To provide conclusive evidence that pLS20cat gene 58 encodes a relaxase we analyzed samples of the *oriT*<sub>LS20</sub>-containing plasmid pGR16B on an agarose gel after being incubated in a buffer with or without purified Rel<sub>LS20</sub>. As shown in Fig 4A, a fraction of the plasmid migrated to a higher position in the gel compared to the Rel<sub>LS20</sub>-untreated sample, showing that Rel<sub>LS20</sub> had relaxed a portion of the plasmid molecules. Rel<sub>LS20</sub> nicked pGR16B in a concentration dependent manner (S5A Fig), but it did not or hardly nicked the control plasmid pUCTA2501 lacking *oriT*<sub>LS20</sub> (S5B Fig).

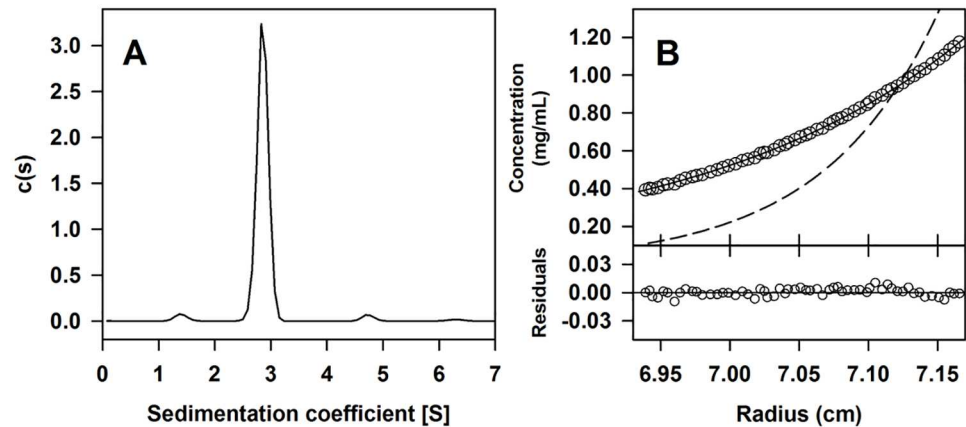

**Fig 3. Analytical ultracentrifugation analyses showed that Rel<sub>LS20</sub> is monomeric in solution.** Purified Rel<sub>LS20</sub> (12 μM) was studied by sedimentation velocity (SV) and sedimentation equilibrium (SE). Plot (A) represents the sedimentation coefficient distribution *c*(s) profile obtained by SV data analysis. Graph (B) shows the experimental data obtained by SE assays (empty circles) and best-fit analysis considering a protein monomer (black line) and dimer (dashed line) species model. Lower part represents the difference between experimental data and the best fit to a single species model (residuals).

doi:10.1371/journal.pgen.1006586.g003

Plasmids pGR16A and pGR16B gave similar nicking efficiencies, indicating that the nicking reaction was independent of the orientation of *oriT<sub>LS0</sub>* (S5C Fig). Rel<sub>LS20</sub> did not relax the plasmid, however, when the reaction mixture contained the chelating agent EDTA (S5D Fig), supporting the view that Rel<sub>LS20</sub> requires divalent cation(s) like Mg for the nicking reaction, as has been observed for other relaxases containing a Histidine triad [19,24, for review see, 26].

Relaxases are often multidomain proteins. Without exception the relaxase domain is located in the N-terminal region of the protein. To test if this also applies to Rel<sub>LS20</sub> we purified its N-terminal region (residues 1–232, which includes the predicted Histidine triad) fused to a His<sub>(6)</sub> tag from *E. coli*, and used this protein, named N-Rel<sub>LS20</sub>, in nicking reactions. As shown in S5E Fig, N-Rel<sub>LS20</sub> relaxed part of the *oriT<sub>LS20</sub>* containing plasmid pGR16B, but not the parental vector pUCTA2501 lacking *oriT<sub>LS20</sub>* indicating that the N-Rel<sub>LS20</sub> domain contains nicking activity.

In all cases studied, the catalytic residue present in the relaxase domain that makes a transient 5′ phosphotyrosine bond with the nucleotide at the nick site corresponds to a tyrosine [for review see, 26]. Based on the following observation, residue Tyr26 might correspond to the catalytic tyrosine residue of Rel<sub>LS20</sub>. The catalytic Tyr residue of MOB<sub>P</sub> family relaxases is present in MOB<sub>P</sub> signature 5. MAST analyses showed that this MOB<sub>P</sub> signature is conserved in 7% of the MOB<sub>L</sub> relaxases (S3 Table). Rel<sub>LS20</sub> is one of the MOB<sub>L</sub> members containing the MOB<sub>P</sub> signature 5. The position of the MOB<sub>P</sub> signature 5 in Rel<sub>LS20</sub> overlaps with that of MOB<sub>L</sub> signature 5 (it is a coincidence that both signatures are named signature 5). An alignment of these two signatures suggests that the catalytic Tyr residue of MOB<sub>P</sub> type relaxases corresponds to Rel<sub>LS20</sub> residue Tyr26 and it shows that this tyrosine residue is almost fully conserved in the Rel<sub>LS20</sub>-related putative relaxases (see Fig 4B). To obtain evidence that Tyr26 is the catalytic tyrosine of Rel<sub>LS20</sub> we engineered a mutant in which codon 26 encodes for a phenylalanine, and used the purified mutant, Rel<sub>LS20</sub>-Y26F, in nicking reactions. No substantial nicking activity was observed for the Y26F mutant (S5F Fig) supporting the view that Y26 is the active Tyrosine.

To locate the position of the nick site within *oriT<sub>LS20</sub>*, we prepared samples of pGR16B that were treated with or without Rel<sub>LS20</sub> and subsequently used these in DNA sequencing

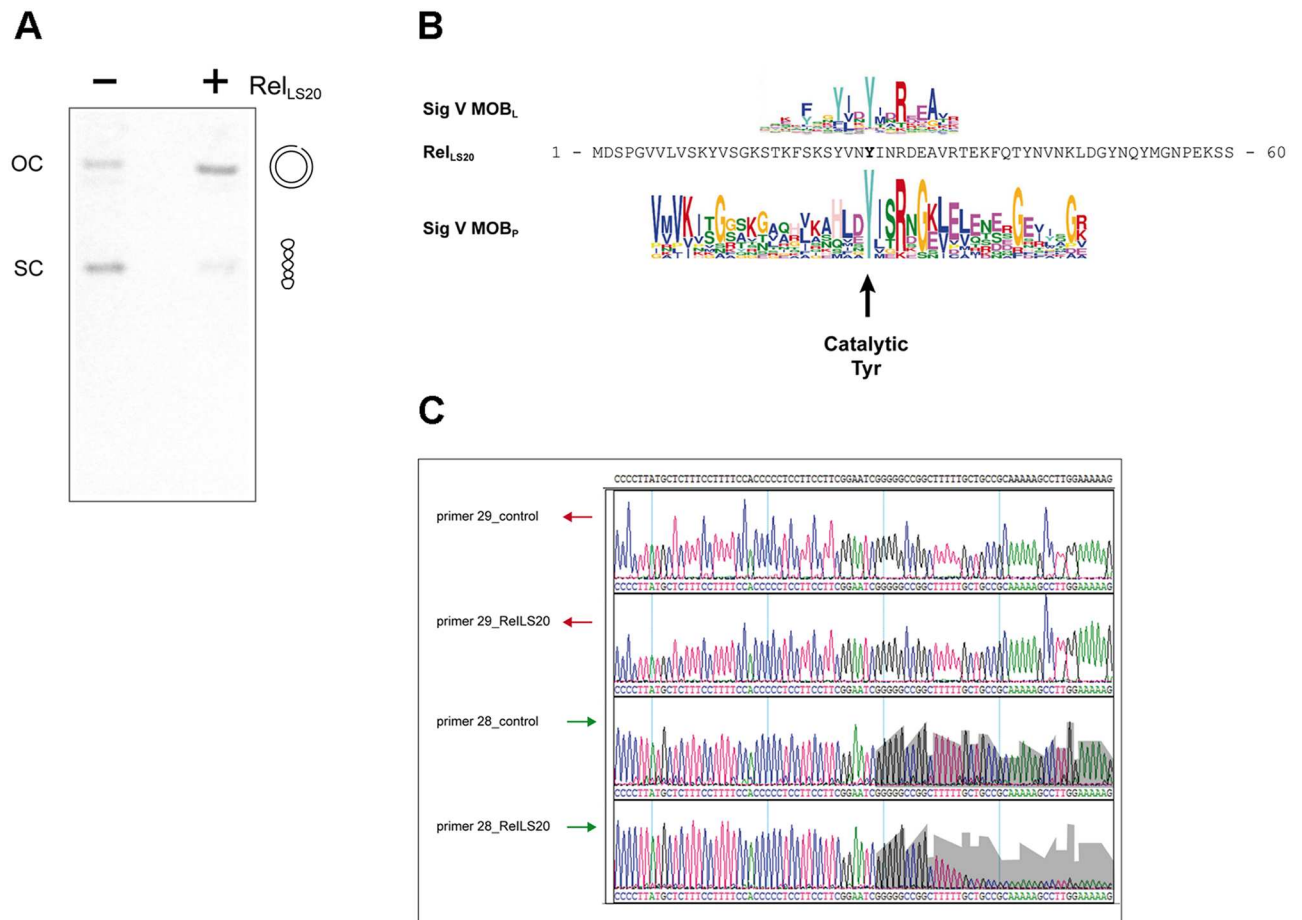

**Fig 4. Determination of the catalytically active tyrosine residue of Rel<sub>LS20</sub>, and the position of the nick site within ori<sub>TLS20</sub>.** (A) Plasmid pGR16B containing *ori<sub>TLS20</sub>* was incubated in a buffer lacking (-) or containing (+) purified Rel<sub>LS20</sub>. Next, both samples were treated with proteinase K and DNA was run on a 0.8% agarose gel. The positions of supercoiled (sc) and nicked open circular DNA (oc) are indicated. (B) The N-terminal 60 residues of Rel<sub>LS20</sub> are aligned with the consensus sequences (presented as weblogs) of signatures 5 of the MOB<sub>L</sub> and MOB<sub>P</sub> type relaxases. The position of the catalytic Tyrosine residue of MOB<sub>P</sub> type relaxases is indicated with a vertical arrow. (C) Samples of pGR16B with (Rel<sub>LS20</sub>) or without (control) prior incubation with Rel<sub>LS20</sub> were used as template DNA in sequencing reactions using forward primer 28 or reverse primer 29. The area of grey background, corresponding to the signal strength obtained with the control sample, is duplicated and overlaid to the same positions of the chromatogram of the Rel<sub>LS20</sub>-treated sample to highlight the drop in signal intensity. Note that the intensities of the signals are very similar for other regions. The residual signal observed after the drop in signal intensity is due to the presence of low amounts of non-nicked plasmid DNA in the sample.

doi:10.1371/journal.pgen.1006586.g004

reactions with convergently oriented primers 28 (forward) or 29 (reverse) that hybridize to regions flanking the *ori<sub>TLS20</sub>* (Fig 4C). Very similar signal intensities were obtained in both reactions using the reverse primer 29. However, in the case of primer 28 the intensity of the signal dropped sharply in the Rel<sub>LS20</sub>-treated DNA sample after the sequence 5'-GAATCGGGGGCCGG-3'. Most likely this drop in signal intensity was due to a nick at this position in the template strand for primer 28.

The *nic* site is flanked by a 30 bp stretch of high GC content (73%) and coincides with the beginning of the inverted repeated sequence 5'-GGCTTTTGGTgccGCAAAAAGCC-3' (see Fig 2B). Thus, Rel<sub>LS20</sub> introduces a nick at a position flanking an inverted repeat in the template strand of the conjugation genes. Implicitly, these results demonstrate that pLS20cat gene 58 encodes the relaxase Rel<sub>LS20</sub>. Fig 2A shows that the mobilization efficiency of the fragments endowing mobility to the pUCTA2501 derivative was 5 to 10 fold higher when cloned in

orientation “B” compared to orientation “A”. The orientation of an *oriT* sequence determines the DNA strand that is transferred into the recipient cell, implying that one pUCTA2501 DNA strand is established better in the recipient than the other. As explained in the discussion, this observation suggests that Rel<sub>LS20</sub> nicks the template strand of the conjugation genes, which is in line with the results presented in Fig 4C.

## Discussion

Here we have identified the *cis*-acting origin-of-transfer region *oriT*<sub>LS20</sub> and the relaxase gene encoding the trans-acting Rel<sub>LS20</sub> protein from pLS20. The relaxosome module is embedded within the large conjugation operon that encompasses genes 28 to 74 [17]. The results obtained have provided a better understanding of the relaxosome components present on Gram-positive mobile elements in general and particularly those belonging to the phylum Firmicutes.

### *oriT*<sub>LS20</sub>

We have delineated *oriT*<sub>LS20</sub> to a region of 362 bp, which is intrinsically bent. Interestingly, about 10-fold higher mobilization efficiencies were obtained for pUCTA2501 derivatives in which *oriT*<sub>LS20</sub> was cloned in orientation “B” compared to orientation “A” (see Table 2). Most probably this difference is due to the following. Relaxases cleave DNA at a site- and strand-specific position, and the nicked strand is transferred into the recipient cell. Consequently, the orientation of *oriT* dictates which DNA strand is transferred into the recipient cell. The replication protein of rolling-circle plasmids, which is related to relaxases, initiate a novel round of replication by introducing a site- and strand-specific nick in the plasmid at the so called double-strand origin (DSO). The 3′-end of the nicked site is used for DNA elongation, which is coupled to displacement of the replicated strand. To complete one round of replication the fully displaced circular ssDNA replication intermediate has to be converted into dsDNA. Efficient ss to dsDNA conversion starts at a specific region called single strand origin (SSO). Several families of SSOs are known, and they all have in common that they are only functional in only one orientation [15]. Since the orientation of *oriT* dictates the DNA strand that is transferred to the recipient cell, only in one orientation of *oriT* the transferred ssDNA strand will have the SSO in its functional orientation, resulting in optimal conversion of the ssDNA to double stranded plasmid DNA. The relation between functionality of an SSO and mobilization efficiency has been reported for other rolling-circle plasmids [34]. According to this reasoning, the *nic* site would be located in the template strand of the conjugation genes. This was indeed confirmed biochemically (Fig 4). *oriT*'s can be located at distinct positions with respect to the relaxase gene. In the case of pLS20cat the *oriT* and the relaxase are separated by a region of 865 bp containing two putative genes.

### The relaxase Rel<sub>LS20</sub>

The relaxase of pLS20cat was not identified by performing standard Blast searches. However, we did identify a stretch of 17 residues in the protein encoded by gene 58 that encompasses a putative HUH motif present in the superfamily of the so-called HUH endonucleases that includes relaxases [26]. We were able to show that gene 58 is required for conjugation, that Rel<sub>LS20</sub> can act in *trans*, and we determined the Rel<sub>LS20</sub>-mediated strand and site-specific nick site within the *oriT*<sub>LS20</sub> region. Together, these results show that gene 58 encodes the relaxase gene of pLS20cat, which we named *rel*<sub>LS20</sub>. We also provided evidence that the nicking activity resides in the N-terminal domain of Rel<sub>LS20</sub> and that tyrosine 26 constitutes the catalytic residue responsible for making a transient 5′ phosphotyrosine bond with the nucleotide at the nick site.

## Rel<sub>LS20</sub> is the prototype of a novel relaxase family, MOB<sub>L</sub>, that contains a large number of relaxases which are almost exclusively encoded in bacteria belonging to the phylum Firmicutes

By performing psiblast searches (7 iterations) we identified 817 sequences in public databases that may encode proteins showing significant homology with Rel<sub>LS20</sub> (cutoff 1e-15), and we classified these relaxases into a new family named MOB<sub>L</sub>. Based on neighbor-joining analysis, the 817 (putative) relaxases can be subdivided into 2 clades (see [S3 Fig](#)) and a large fraction of the clade 1 *mob<sub>L</sub>* relaxase genes are located on a plasmid.

Interestingly, four relaxases identified in our database screens as members of the MOB<sub>L</sub> family, had been classified before in the MOB<sub>P</sub> family. These four members concern NCBI reference accession numbers: WP\_011264114.1 (encoded by plasmid pBCNF5603 of *Clostridium perfringens* F5603), WP\_010968268.1 (encoded by plasmid pCP13 of *C. perfringens* strain 13), WP\_011377372.1 (encoded by conjugative plasmid pHTβ of *E. faecium*) [30], and WP\_012477521.1 (encoded by the 21 kb pEF1 plasmid of *E. faecium* 6T1a) [35]. When these relaxases were classified in 2009 it was mentioned that “*the phylogenetic position of these proteins is out of the clades of the MOB<sub>P</sub> tree described in this work*” [24]. Therefore, we propose that these four relaxases belong to the MOB<sub>L</sub> family defined here.

Previously, a scheme depicting the relationship between the main relaxase families has been presented [24]. In this scheme the MOB<sub>Q</sub>, MOB<sub>V</sub> and MOB<sub>P</sub> families form a large cluster. The other MOB families, including protein families having nicking-closing activities that overlap with some of these MOB families, have been placed into three other groups. We identified Rel<sub>LS20</sub> based on the presence of a putative 3-histidine motif, and sequences encompassing this motif (MOB<sub>L</sub> signature 1) are highly conserved among the MOB<sub>L</sub> relaxases. A 3-histidine motif is also present in relaxases belonging to the MOB<sub>F</sub>, MOB<sub>Q</sub>, MOB<sub>V</sub> and MOB<sub>P</sub> families. Using the Motif and Alignment tool MAST, sequences showing significant similarity to MOB<sub>L</sub> signature 1 were identified in a number of relaxases of the MOB<sub>Q</sub>, MOB<sub>V</sub> and MOB<sub>P</sub> families where they overlap with the corresponding 3-histidine motif. However, MOB<sub>L</sub> signature 1 does not show significant similarity with the 3-histidine motif of relaxases of the MOB<sub>F</sub> family. This indicates that the MOB<sub>L</sub> family is more closely related to the MOB<sub>Q</sub>, MOB<sub>V</sub> and MOB<sub>P</sub> families. Additional analyses revealed that the MOB<sub>L</sub> family is most closely related to the MOB<sub>P</sub> family. Based on this we propose the MOB<sub>L</sub> family being a new member of the previously defined cluster including the MOB<sub>Q</sub>, MOB<sub>V</sub> and MOB<sub>P</sub> families. An updated scheme of the relationships between the main relaxase protein families is presented in [Fig 5](#).

Relaxases belonging to the previously defined six MOB families are generally present in multiple bacterial phyla [24]. An important finding of this work is that the vast majority (98.2%) of the MOB<sub>L</sub> relaxases are present in bacteria belonging to the phylum of Firmicutes. It is therefore likely that the MOB<sub>L</sub> type relaxases play a prominent role in horizontal gene transfer in Firmicutes bacteria. The finding that many of the MOB<sub>L</sub> relaxases identified here are located on plasmids supports this assumption.

Firmicutes bacteria can be found in a wide variety of habitats. One of the habitats in which Firmicutes are notably present is the gastrointestinal tract of mammals including humans, and evidence is accumulating that a balanced gut microbiome plays important roles in the health of these organisms [36]. Dysbiosis in the gut microbiome composition as a consequence of an oral antibiotic treatment can have substantial consequences [37]. The effects can be worsened when the gut microbiome contains bacteria that are resistant to the antibiotic treatment, especially when the resistant bacteria concern (opportunistic) pathogens. In the recent years evidence has been presented that the number of antibiotic resistance genes in the gut microbiome is increasing and that this pool of resistance genes may contribute to future emergence and

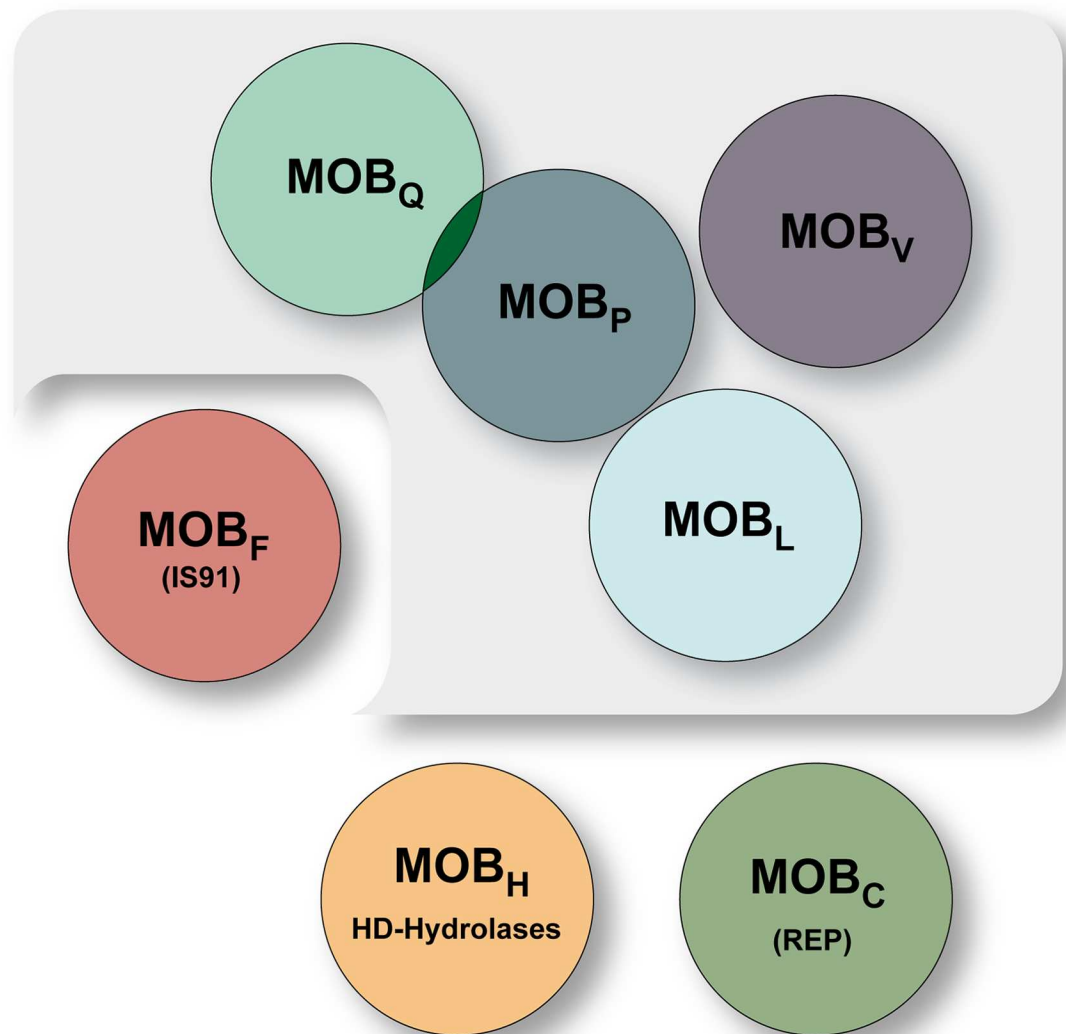

**Fig 5. Schematic presentation of the relationships between the main relaxase protein families.** The MOB<sub>Q</sub>, MOB<sub>V</sub>, MOB<sub>P</sub>, and MOB<sub>L</sub> families belong to one large cluster (shown on a grey background). The other MOB families are divided into three independent groups. Note that these overlap with other protein families having DNA nicking-closing activities such as the replication proteins of rolling-circle plasmids (REP), IS91-like transposases (IS91) or HD hydrolases. The MOB<sub>F</sub> family of relaxases contain a motif III that is also present in relaxases of the MOB<sub>Q</sub>, MOB<sub>P</sub>, MOB<sub>V</sub> and MOB<sub>L</sub> families. MOB<sub>P</sub> includes relaxases that are also classified as MOB<sub>HEN</sub>.

doi:10.1371/journal.pgen.1006586.g005

spread of antibiotic resistance in (human) pathogens [5,6]. Conjugation is considered the major mechanism responsible for antibiotic resistance in general. Together, this warrants a better understanding of the conjugative elements present in the gut microbiome. Relaxases are essential for conjugation. Therefore, they form a target to interfere with conjugation mediated spread of antibiotic resistance [22,38]. Moreover, once the essential relaxase gene has been identified the related conjugative element can be relatively easily recognized and studied. Therefore, the identification in this work of more than 800 (putative) relaxase genes present almost exclusively in bacteria of the phylum Firmicutes is likely to have significant impacts on the identification and analysis of mobile elements in this phylum of bacteria that is largely represented in mammalian gut microbiota.

## Materials and methods

### Bacterial strains, plasmids, media and oligonucleotides

*Escherichia coli* and *B. subtilis* strains were grown in Luria-Bertani (LB) liquid medium or on 1.5% LB agar plates. When appropriate, media were supplemented with the following antibiotics: ampicillin (100 µg/ml), erythromycin (1 and 150 µg/ml in *B. subtilis* and *E. coli*, respectively), chloramphenicol (5 µg/ml), spectinomycin (100 µg/ml), and kanamycin (10 and 30 µg/ml in *B. subtilis* and *E. coli*, respectively). *B. subtilis* strains used were isogenic with *B. subtilis* strain 168 and are listed in [S4 Table](#). Plasmids and oligonucleotides used are listed in [S5](#) and [S6](#) Tables, respectively. All oligos were purchased from Isogen Life Science, The Netherlands.

### Transformation

*E. coli* cells were transformed using standard methods [39]. Preparation of competent *B. subtilis* cells and transformation were carried out as described before [40]. Transformants were selected on LB agar plates with appropriate antibiotics. pLS20cat encodes a protein, Rok<sub>LS20</sub>, that inhibits the development of competence by repressing *comK*, the key transcriptional activator of competence genes [41]. Therefore, to manipulate genes on pLS20cat we prepared competent cells of a pLS20cat-harboring strain that contains a chromosomal P<sub>xy1</sub>-*comK* fusion (PKS56) using a standard protocol [41].

### Construction of plasmids and strains

The correctness of sequences of all cloned PCR fragments was confirmed by sequence analysis. Amplification by PCR of pLS20cat regions was performed using total DNA isolated from pLS20cat harboring strain PKS11 as template. Plasmid pLS20Δ56–58 was constructed by replacing genes 56, 57 and 58 with the kanamycin gene of plasmid pBEST501 as follows. The upstream region of gene 56 (PCR-UP-56) and the downstream region of gene 58 (PCR-DN-58) were amplified by PCR using pLS20cat as template DNA in combination with primer sets oGR56/oGR57 and oGR58/oGR59, respectively. The resulting PCR fragments were digested with *Bam*HI and *Sal*I. Plasmid pBEST501 was digested with *Bam*HI and *Sal*I and the resulting 800 bp fragment containing the kanamycin gene was purified. Next, the DNA fragments corresponding to PCR-UP-56, PCR-DN-58, and the kanamycin gene were used to prepare a ligation mixture. After ligation, this mixture was used to transform competent cells of pLS20cat-containing *B. subtilis* cells of strain PKS56. Deletion of genes 56–58 of kanamycin-resistant transformants was first confirmed by PCR using primers Ori-UP and Ori-Dn. Next, the absence of mutations in the PCR amplified regions was confirmed by sequence analysis, which in addition affirmed replacement of genes 56–58 by the kanamycin resistance gene. The resulting strain containing plasmid pLS20Δ56–58 was named GR148. Finally, pLS20Δ56–58 was isolated from strain GR148 and used to transform competent cells of the appropriate strain.

The following strategy was used to clone the pLS20cat genes 56, 57 and 58 behind the IPTG-inducible P<sub>spank</sub> promoter in the *B. subtilis amyE* integration vector pDR110. The genes were amplified by PCR using primers oGR43 and oGR60. After purification, the PCR fragment was digested with *Nhe*I and *Sph*I and then ligated with the vector pDR110 cut with the same enzymes. Plasmid DNA of the constructed vector pGR27 was isolated from *E. coli* cells and then used to transform competent *B. subtilis* cells. Double-crossover integration into the chromosome was checked by the loss of amylase activity. A similar strategy was used to construct a *B. subtilis* strain GR206 in which pLS20cat genes 56 and 57 were placed under the control of the P<sub>spank</sub> promoter at the chromosomal *amyE* locus. In this case, the genes were amplified by PCR using primers oGR27 and oGR133. The purified PCR fragment was digested

with *SpeI* and *SphI* and then ligated with the vector pDR110 cut with *NheI* and *SphI*. Plasmid DNA of the constructed vector pGR52 was isolated from *E. coli* cells and then used to transform competent *B. subtilis* cells. Double-crossover integration into the chromosome was checked by the loss of amylase activity.

The *E. coli/B. subtilis* shuttle vector pUCTA2501 contains the replication functions of the cryptic *B. subtilis* rolling-circle plasmid pTA1015 [15] as well as the erythromycin resistance gene of pE194. The following strategy was used to create pUCTA2501 derivatives containing a fragment of plasmid pLS20cat. First, the desired pLS20cat region was amplified by PCR using appropriate primers. Next, after the purified PCR fragments had been digested with *XbaI*, the fragments were ligated to the vector pUCTA2501 linearized with *XbaI*, and the resulting ligation mixture was used to transform competent *E. coli* XL1-blue cells. The correctness and the orientation of the inserts were checked by sequencing. The names of the pUCTA2501 derivatives and their characteristics are listed in S5 Table. Each pUCTA2501 derivative plasmid was then used to transform competent *B. subtilis* 168 cells. The presence of the plasmid in erythromycin-resistant transformants was confirmed by PCR and pLS20cat was introduced into the strain by conjugation using strain PKS11 as donor. The resulting strains are listed in S4 Table.

The pLS20cat gene 58 (*rel<sub>LS20</sub>*) was cloned as follows in the *E. coli* expression vector pET28b+ to generate a fusion gene containing a C-terminal *his*<sub>(6)</sub> extension. *Rel<sub>LS20</sub>* was amplified with primerset oWM001-oWM002. The resulting PCR fragment was digested with *NcoI* and *Sall* and cloned in pET28b+ digested with the same restriction enzymes. The resulting pET28b+ derivative named pAND83, was constructed using *E. coli* strain XL-blue1. Once verified its correctness, the plasmid was transformed into *E. coli* strain BL21(DE3). Using the same strategy, the N-terminal region of pLS20cat gene 58 (*N-rel<sub>LS20</sub>*) was cloned in the pET28b+ vector. In this case, *N-rel<sub>LS20</sub>* was amplified with primerset oWM001-oWM003. The derivative of *rel<sub>LS20</sub>* in which Tyrosine codon 26 was mutated to encode a Phenylalanine (*rel<sub>LS20</sub>-Y26F*) was constructed as follows. A DNA fragment containing the desired mutation was generated by PCR using pAND83 as template and primerset oWM001A-oWM002. The resulting DNA fragment was then extended at its 5' end by two PCR reactions. First, the PCR product was used as template in a PCR reaction with primerset oWM001B-oWM002; and second, this PCR product served as template for the final PCR reaction using primerset oWM001-oWM002. Next, the PCR fragment was cloned into pET28b+ using the same strategy as that used for cloning the wild type *rel<sub>LS20</sub>*.

## Conjugation/mobilization assays

Conjugation was carried out in liquid medium as described previously [17]. The effect of ectopic expression of a given gene placed under the control of the inducible *P<sub>spank</sub>* promoter on conjugation was studied by adding the inducer (1 mM IPTG) to prewarmed LB medium used to dilute overnight cultures of the donor cells.

## Analytical ultracentrifugation experiments

**Sedimentation velocity assays (SV).** Samples at concentrations ranging from 12 to 48  $\mu$ M, in 20 mM Tris, 500 mM NaCl, 10 mM MgCl<sub>2</sub>, 1 mM EDTA, 0.1 mM  $\beta$ -Mercaptoethanol and 1% glycerol, pH 7.4, were loaded (320  $\mu$ L) into analytical ultracentrifugation cells. The experiments were carried out at 48,000 rpm in a XL-I analytical ultracentrifuge (Beckman-Coulter Inc.) equipped with both UV-VIS absorbance and Raleigh interference detection systems, using an An-50Ti rotor, and 12 mm Epon-charcoal standard double-sector centerpieces. Sedimentation profiles were recorded at 230 nm. Differential sedimentation coefficient distributions were calculated by least-squares boundary modelling of sedimentation velocity data



using the continuous distribution  $c(s)$  Lamm equation model as implemented by SEDFIT [42]. These  $s$  values were corrected to standard conditions (water, 20°C, and infinite dilution) using the program SEDNTERP [43] to obtain the corresponding standard  $s$  values ( $s_{20,w}$ ).

**Sedimentation equilibrium assays (SE).** SE experiments of Rel<sub>LS20</sub> samples were carried out using short columns (100 μL) at speeds ranging from 12,000 to 15,000 rpm and at two wavelengths (230 and 280 nm), using the same experimental conditions and instrument as in the SV experiments. After the last equilibrium scan, a high-speed centrifugation run (48,000 rpm) was done to obtain the corresponding baseline offsets. Weight-average buoyant molecular weights of protein were determined by fitting a single species model to the experimental data using the HeteroAnalysis program [44] and corrected for solvent composition and temperature with the program SEDNTERP [43].

**Dynamic light scattering assays (DLS).** DLS experiments were carried out in a Protein Solutions DynaPro MS/X instrument (Protein Solutions, Piscataway, NJ) at 20°C using a 90° light scattering cuvette. Prior to measurements, samples at the same experimental conditions used in SV and SE, were centrifuged for 10 min at 12,000g and 4°C. Data were collected and analyzed with Dynamics V6 Software.

**Estimate of molar mass of Rel<sub>LS20</sub> from hydrodynamic measurements.** The apparent molar mass of a single sedimenting solute species ( $M$ ) may be calculated using measured values of the sedimentation coefficient  $s$  and the diffusion coefficient  $D$  according to the Svedberg equation [45],

$$M = \frac{RTs}{(1 - \bar{v}\rho)D}$$

where  $T$ ,  $R$ , and  $\rho$  stand for the absolute temperature, the universal gas constant and the density of the solution, respectively. The estimate of molar mass obtained via this relation is independent of the shape of the sedimenting/diffusing species, as frictional coefficients for sedimentation and diffusion cancel in the derivation of the equation.

## Overexpression and purification of recombinant Rel<sub>LS20</sub> and derivatives containing a C-terminal His<sub>(6)</sub> tag

A recombinant version of Rel<sub>LS20</sub> was expressed and purified as follows. *E. coli* BL21(DE3) cells containing plasmid pAND83 (*rel<sub>LS20</sub>His<sub>(6)</sub>*) were inoculated in fresh LB media complemented with 30 μg/ml kanamycin and grown at 37°C with shaking (200 rpm). At an OD<sub>600</sub> of about 0.6, IPTG was added to a final concentration of 1 mM to induce the recombinant protein and growth was continued for 2 h. Next, cells were collected by centrifugation and processed as described previously [41]. The nickel-column purified proteins (>95% pure) were finally dialysed against buffer B (20 mM Tris-HCl pH 8.0, 1 mM EDTA, 500 mM NaCl, 10 mM MgCl<sub>2</sub>, 7mM β-mercaptoethanol, 50% v/v glycerol) and stored in aliquots at -80°C. Bradford assay and OD<sub>280</sub> determination were used to determine the protein concentrations. The SDS PAGE presented in S6 Fig visualizes the purification step of Rel<sub>LS20</sub>. The same methodology was used to purify the N-terminal domain of Rel<sub>LS20</sub> and the Y26F mutant protein. Apparently, the Tyr26F mutation affects the stability of the protein. This conclusion is based on our findings that the yield of purified mutant protein was much lower than that obtained for full-length Rel<sub>LS20</sub> or its N-terminal domain. Consequently, the level of purity obtained for the mutant protein was lower than that for the full-length Rel<sub>LS20</sub> or N-Rel<sub>LS20</sub>.

## Determination of the Rel<sub>LS20</sub>-mediated nick site in *oriT<sub>LS20</sub>*

Rel<sub>LS20</sub> nicking activity was assayed in 10  $\mu$ L reaction volumes containing 2 nM supercoiled plasmid pGR16B and the indicated protein concentration in 20 mM Tris/HCl pH 7.5, 5 mM MgCl<sub>2</sub>, 5 mM NaCl, 0.1 mM EDTA and 50  $\mu$ g/mL BSA. The reaction mixture was incubated for 15 minutes at 37°C in a water bath. To stop the reaction, 25  $\mu$ g/mL Proteinase K, 0.5% SDS and 25mM EDTA were added followed by incubation at 37°C for 20 minutes. Then, 6X DNA loading buffer was added to a final concentration of 1X, and all the volume was loaded in a 0.8% agarose gel, prestained with Sybr-safe. Gels were run at 20V overnight at 4°C and then photographed. In addition, nicking reactions were carried out in duplicates, and after the reactions were stopped the DNA was purified using a commercial kit (Wizard, Promega) after which the purified plasmid DNAs were employed in Sanger sequencing reactions using primer oGR28 or oGR29.

### *In silico* analyses

**Prediction of static bents in pLS20cat DNA.** The entire pLS20cat sequence (accession number NC\_015148.1) was analyzed for the presence of intrinsic bents according to the dinucleotide wedge model using parameters “AAWedge” and “Cacchione & De Santis” [46] implemented in the program *dnacurve.py* (<http://www.lfd.uci.edu/~gohlke/code/dnacurve.py.html>). To allow analysis of the entire plasmid the default sequence length limit of the program was raised. Two set of parameters were tested (“AAWedge” and “Cacchione & De Santis”). For both, the curvature, and the curvature-angle were calculated for each position using window sizes of 10 and 15 bp, respectively. These values were smoothed using a sliding window of 600 bp and normalized to mean 0 and standard deviation 1.

**Identification of Mob<sub>L</sub> members.** Rel<sub>LS20</sub> was used as a query sequence to execute a psi-blast search against the NCBI nr protein database (version 2.2.30+, January 17, 2015), allowing up to 10 rounds of reiteration with an E-value threshold of 1e-15 [47–49]. This search resulted in the detection of 962 sequences. The program “USEARCH” (version 8.0.1517\_i86linux32) was then used to identify and remove redundant sequences showing 100% identity [50], resulting in 817 unique hits showing high similarity to Rel<sub>LS20</sub>.

**MEME and MAST.** The motif-identification program MEME (Bailey and Elkan, 1994) (<http://meme-suite.org/tools/meme>, version 4.10.0) was used to identify conserved motifs, which we named “signatures” to distinguish them from “motifs” published before, in members of the MOB<sub>L</sub> and previously described MOB families [24]. We noted that more specific motifs were obtained when reducing the redundancy between the input sequences. The function “cluster\_fast” of the program USEARCH [50] was used to remove similar sequences, keeping only the centroids of clusters of sequences that shared more than 50% of identity. MEME was run against the remaining proteins, setting the search to retrieve up to a maximum of ten motifs for each family with an E-value below 1e-15. The program MAST [51] of the MEME suite was used to study if an identified motif of a given MOB family was present in member(s) of any of the other MOB families using an E-value threshold of 1e-6.

**Neighbor-joining analysis.** The program “MEGA6” [52] was employed for constructing a condensed phylogenetic tree by reducing the length of interior branches with low statistical support to 0. Protein sequences longer than 300 residues were included in the analysis. The phylogeny was built by neighbor-joining and tested by 1000 bootstraps.

**Crossing MOB<sub>L</sub> members against constructed plasmid database.** Plasmids deposited in the NCBI nr database were retrieved by screening the annotations for the keywords “plasmid” and “circular DNA”. The 10,904 plasmids retrieved at 27 May 2015 were used to build a blast database. Next, each MOB<sub>L</sub> member was run against the constructed plasmid database using

tblastn. A MOB<sub>L</sub> member was considered to be located on a plasmid if an identity of more than 95% was identified over more than 80% of the entire protein sequence.

## Supporting information

**S1 Fig. Identification of ten signatures in MOB<sub>L</sub> type relaxases and distribution of the identified signatures in the primary sequence of Rel<sub>LS20</sub>.** (A) Weblogo representation of the ten signatures identified in the MOB<sub>L</sub> type relaxases using the motif-identification program MEME. Name of the signatures (sig) is given on the left. The position of the signature in the primary Rel<sub>LS20</sub> sequence is presented at the right. (B) Position of ten signatures identified by MEME for the MOB<sub>L</sub> type relaxases in the Rel<sub>LS20</sub> primary sequence. The primary sequence of the Rel<sub>LS20</sub> protein is presented along with the position of eight MOB<sub>L</sub> signatures identified by MEME. The colour code used for the signatures is consistent with that used for the Weblogo presentations given in (A). The Rel<sub>LS20</sub> region showing similarity with part of the motifs III of the MOB<sub>P</sub>, MOB<sub>Q</sub> and MOB<sub>V</sub> type relaxases (see Fig 1) is highlighted in red. Note that MOB<sub>L</sub> signatures III and IX are not present in Rel<sub>LS20</sub>. (TIF)

**S2 Fig. Weblogo presentation of up to ten signatures identified for relaxases belonging to the MOB<sub>P</sub> (A), MOB<sub>Q</sub> (B), MOB<sub>V</sub> (C), MOB<sub>F</sub> (D), MOB<sub>H</sub> (E), and MOB<sub>C</sub> (F) family using the motif-identification program MEME.** Names of the signatures (sig) is given on the left. (PDF)

**S3 Fig. Phylogenetic tree of MOB<sub>L</sub> family of relaxases.** The phylogenetic tree was constructed using the program “MEGA6” (see Materials and methods) and phylogeny was built by neighbor-joining and tested by 1000 bootstraps. Members of the resulting two clades are given in red (clade 1) and blue (clade 2). Rel<sub>LS20</sub>, belonging to clade 1, is highlighted in green. (PDF)

**S4 Fig. *In silico* analyses predicts a static bent in the pLS20cat region near *oriT*<sub>LS20</sub>.** The entire pLS20cat sequence (accession number NC\_015148.1) was analyzed for the presence of intrinsic bents according to the dinucleotide wedge model [46, see Materials and methods]. The predicted probability of sequences to form a static bent is presented as a function of the pLS20cat sequence. Maximum values peak around pLS20cat positions 2,200 and 27,500. The latter position, -27,500-, coincides with *oriT*<sub>LS20</sub>. Positions around 2,200 correspond to the region containing the divergently oriented promoters P<sub>rco</sub> and P<sub>c</sub> driving expression of regulatory gene *rco*<sub>LS20</sub> and the conjugation operon, respectively, which has been demonstrated to contain a static bent [18]. (TIF)

**S5 Fig. Biochemical characterization of Rel<sub>LS20</sub>.** (A) The efficiency of the Rel<sub>LS20</sub> nicking reaction is concentration dependent. Plasmid pGR16B (2 nM) was incubated without (-) or with increasing amounts of Rel<sub>LS20</sub> (4.25, 12.5, 25 and 50 nM, respectively). (B) A supercoiled plasmid lacking *oriT*<sub>LS20</sub> is not relaxed by Rel<sub>LS20</sub>. The empty pUCTA2501 *oriT*-screening vector (2 nM), was incubated without (-) or with (+, 25 nM). (C) Rel<sub>LS20</sub>-mediated plasmid relaxation is independent of *oriT*<sub>LS20</sub> orientation. Plasmids pGRA16A and pGRA16B (2 nM), which differ only in the orientation of *oriT*<sub>LS20</sub>, were treated without (-) or with (+, 25 nM) Rel<sub>LS20</sub>. (D) Rel<sub>LS20</sub>-mediated nicking is inhibited by the chelating agent EDTA. Plasmid pGR16B (2 nM) was treated with Rel<sub>LS20</sub> (25 nM) in the absence (-) or presence (+) of 10 mM EDTA. (E) The nicking activity of Rel<sub>LS20</sub> resides in its N-terminal domain. Plasmid pGR16B (2 nM) was incubated without (-) or with increasing concentrations of N-Rel<sub>LS20</sub> (12.5, 25, 50, 100, 200

and 400 nM, respectively). In the last lane, labelled “C”, the empty vector pUCTA2501 was incubated with 200 nM N-Rel<sub>LS20</sub>. (F) Rel<sub>LS20</sub> residue Tyr26 is important for nicking activity. Plasmid pGR16B (2 nM) was incubated without (-) or with Rel<sub>LS20</sub>Y26F (50 nM). After incubation, the samples were treated with proteinase K and the DNAs were separated on 0.8% agarose gels. The positions of supercoiled (sc) and nicked open circular DNA (oc) are indicated. (TIF)

**S6 Fig. Purification of Rel<sub>LS20</sub>.** A Coomassie Brilliant Blue stained 12% SDS PAA gel reflecting Rel<sub>LS20</sub> nickel column purification steps. Rel<sub>LS20</sub> was overexpressed in the *E. coli* strain AZ43 which corresponds to strain BL21(DE3) harboring pET28b+ derivative pAND84 (see [S4 Table](#)). Aliquots of different steps were loaded. Control lane “C”, 4 µl prestained marker proteins (ThermoFisher PageRuler Plus (10–250 kDa); increasing molecular weights of approximately 10, 15, 25, 35, 55, 70, 100, 130 and 250 kDa, respectively). Lane 1, supernatant fraction of induced AZ43 cells (5 µg total protein loaded). Lane 2, flow-through of the centrifuged total lysate adjusted to 20 mM imidazole after passing the Nickel column (5 µg total protein loaded). Lane 3, washing step (fraction 7, corresponding to ~40 mM imidazole (6 µl)). Lane 4, fraction 40, corresponding to ~100 mM imidazole (16 µl). Lane 5, pool of eluted fractions (lateral 200 mM imidazole elution peaks corresponding to fractions 12–15 and 19–40, 5 µg loaded). Lane 6, pool of eluted fractions (central 200 mM imidazole elution peak with highest concentrations of Rel<sub>LS20</sub> corresponding to fractions 16–18, 5 µg loaded). Each fraction corresponded to 1 ml. The N-terminal domain of Rel<sub>LS20</sub> and the Y26F mutant were purified using the same methodology. (TIF)

**S1 Table. Proteins in the NCBI database showing significant similarity with Rel<sub>LS20</sub>.** (PDF)

**S2 Table. Occurrence (%) of MOB<sub>L</sub> signatures in members of other MOB families (%).** (DOCX)

**S3 Table. Occurrence (%) of the signatures of the MOB<sub>Q</sub>, MOB<sub>V</sub>, MOB<sub>P</sub>, MOB<sub>F</sub>, MOB<sub>C</sub> and MOB<sub>H</sub> in members of the MOB<sub>L</sub> family.** (DOCX)

**S4 Table. Strains used.** (DOCX)

**S5 Table. Plasmids used.** (DOCX)

**S6 Table. Oligonucleotides used.** (DOCX)

## Acknowledgments

We thank Jose Belio for help with preparing the Figures, and Margarita Salas and Jeff Errington for their support on our work. We also want to acknowledge helpful discussion with other lab members.

## Author contributions

**Conceived and designed the experiments:** DA JRLO CA LJW DRB WJJM.

**Performed the experiments:** GR AMA PKS IC CGC JAH JRLO WJJM.

**Analyzed the data:** GR AMA DA PKS IC JAH JRLO CA LJW DRB WJJM.

**Contributed reagents/materials/analysis tools:** DA JRLO CA LJW DRB WJJM.

**Wrote the paper:** DA LJW DRB WJJM.

## References

- Mazel D, Davies J (1999) Antibiotic resistance in microbes. *Cell Mol Life Sci* 56: 742–754. PMID: [11212334](#)
- Waters VL (1999) Conjugative transfer in the dissemination of beta-lactam and aminoglycoside resistance. *Front Biosci* 4: D433–D456. PMID: [10228095](#)
- Norman A, Hansen LH, Sorensen SJ (2009) Conjugative plasmids: vessels of the communal gene pool. *Philos Trans R Soc Lond B Biol Sci* 364: 2275–2289. [364/1527/2275](#) [pii]. doi: [10.1098/rstb.2009.0037](#) PMID: [19571247](#)
- Davies J, Davies D (2010) Origins and evolution of antibiotic resistance. *Microbiol Mol Biol Rev* 74: 417–433. [74/3/417](#) [pii]. doi: [10.1128/MMBR.00016-10](#) PMID: [20805405](#)
- Sommer MO, Dantas G, Church GM (2009) Functional characterization of the antibiotic resistance reservoir in the human microflora. *Science* 325: 1128–1131. [325/5944/1128](#) [pii]. doi: [10.1126/science.1176950](#) PMID: [19713526](#)
- Sommer MO, Church GM, Dantas G (2010) The human microbiome harbors a diverse reservoir of antibiotic resistance genes. *Virulence* 1: 299–303. [12010](#) [pii]. doi: [10.4161/viru.1.4.12010](#) PMID: [21178459](#)
- Forsberg KJ, Reyes A, Wang B, Selleck EM, Sommer MO, Dantas G (2012) The shared antibiotic resistome of soil bacteria and human pathogens. *Science* 337: 1107–1111. [337/6098/1107](#) [pii]. doi: [10.1126/science.1220761](#) PMID: [22936781](#)
- Penders J, Stobberingh EE, Savelkoul PH, Wolfs PF (2013) The human microbiome as a reservoir of antimicrobial resistance. *Front Microbiol* 4: 87. doi: [10.3389/fmicb.2013.00087](#) PMID: [23616784](#)
- van SW (2015) The human gut resistome. *Philos Trans R Soc Lond B Biol Sci* 370: 20140087. [rstb.2014.0087](#) [pii]. doi: [10.1098/rstb.2014.0087](#) PMID: [25918444](#)
- Sankar SA, Lagier JC, Pontarotti P, Raoult D, Fournier PE (2015) The human gut microbiome, a taxonomic conundrum. *Syst Appl Microbiol* 38: 276–286. [S0723-2020\(15\)00045-4](#) [pii]. doi: [10.1016/j.syapm.2015.03.004](#) PMID: [25864640](#)
- Devirgiliis C, Zinno P, Perozzi G (2013) Update on antibiotic resistance in foodborne *Lactobacillus* and *Lactococcus* species. *Front Microbiol* 4: 301. doi: [10.3389/fmicb.2013.00301](#) PMID: [24115946](#)
- Tanaka T, Kuroda M, Sakaguchi K (1977) Isolation and characterization of four plasmids from *Bacillus subtilis*. *J Bacteriol* 129: 1487–1494. PMID: [403179](#)
- Koehler TM, Thorne CB (1987) *Bacillus subtilis* (natto) plasmid pLS20 mediates interspecies plasmid transfer. *J Bacteriol* 169: 5271–5278. PMID: [3117774](#)
- Itaya M, Sakaya N, Matsunaga S, Fujita K, Kaneko S (2006) Conjugational transfer kinetics of pLS20 between *Bacillus subtilis* in liquid medium. *Biosci Biotechnol Biochem* 70: 740–742. [JST.JSTAGE/bbb/70.740](#) [pii]. PMID: [16556997](#)
- Meijer WJJ, Wisman GBA, Terpstra P, Thorsted PB, Thomas CM, Holsappel S, Venema G, Bron S (1998) Rolling-circle plasmids from *Bacillus subtilis*: complete nucleotide sequences and analyses of genes of pTA1015, pTA1040, pTA1050 and pTA1060, and comparisons with related plasmids from Gram-positive bacteria. *FEMS Microbiol Rev* 21: 337–368. PMID: [9532747](#)
- Meijer WJJ, de Boer A, van Tongeren S, Venema G, Bron S (1995) Characterization of the replication region of the *Bacillus subtilis* plasmid pLS20: a novel type of replicon. *Nucleic Acids Res* 23: 3214–3223. PMID: [7667098](#)
- Singh PK, Ramachandran G, Ramos-Ruiz R, Peiro-Pastor R, Abia D, Wu LJ, Meijer WJ (2013) Mobility of the Native *Bacillus subtilis* Conjugative Plasmid pLS20 Is Regulated by Intercellular Signaling. *PLoS Genet* 9: e1003892. [PGENETICS-D-13-01403](#) [pii]. doi: [10.1371/journal.pgen.1003892](#) PMID: [24204305](#)
- Ramachandran G, Singh PK, Luque-Ortega JR, Yuste L, Alfonso C, Rojo F, Wu LJ, Meijer WJ (2014) A Complex Genetic Switch Involving Overlapping Divergent Promoters and DNA Looping Regulates Expression of Conjugation Genes of a Gram-positive Plasmid. *PLoS Genet* 10: e1004733. [PGENETICS-D-14-01424](#) [pii]. doi: [10.1371/journal.pgen.1004733](#) PMID: [25340403](#)
- Smillie C, Garcillán-Barcia MP, Francia MV, Rocha EPC, De la Cruz F (2010) Mobility of plasmids. *Microbiol Mol Biol Rev* 74: 434–452. doi: [10.1128/MMBR.00020-10](#) PMID: [20805406](#)

20. Alvarez-Martinez CE, Christie PJ (2009) Biological diversity of prokaryotic type IV secretion systems. *Microbiol Mol Biol Rev* 73: 775–808. doi: [10.1128/MMBR.00023-09](https://doi.org/10.1128/MMBR.00023-09) PMID: [19946141](https://pubmed.ncbi.nlm.nih.gov/19946141/)
21. De la Cruz F, Frost LS, Meyer RJ, Zechner EL (2010) Conjugative DNA metabolism in Gram-negative bacteria. *FEMS Microbiol Rev* 34: 18–40. FMR195 [pii]. doi: [10.1111/j.1574-6976.2009.00195.x](https://doi.org/10.1111/j.1574-6976.2009.00195.x) PMID: [19919603](https://pubmed.ncbi.nlm.nih.gov/19919603/)
22. Lujan SA, Guogas LM, Ragonese H, Matson SW, Redinbo MR (2007) Disrupting antibiotic resistance propagation by inhibiting the conjugative DNA relaxase. *Proc Natl Acad Sci U S A* 104: 12282–12287. 0702760104 [pii]. doi: [10.1073/pnas.0702760104](https://doi.org/10.1073/pnas.0702760104) PMID: [17630285](https://pubmed.ncbi.nlm.nih.gov/17630285/)
23. Francia MV, Varsaki A, Garcillan-Barcia MP, Latorre A, Drains C, De la Cruz F (2004) A classification scheme for mobilization regions of bacterial plasmids. *FEMS Microbiol Rev* 28: 79–100. S0168644503000780 [pii]. doi: [10.1016/j.femsre.2003.09.001](https://doi.org/10.1016/j.femsre.2003.09.001) PMID: [14975531](https://pubmed.ncbi.nlm.nih.gov/14975531/)
24. Garcillan-Barcia MP, Francia MV, De la Cruz F (2009) The diversity of conjugative relaxases and its application in plasmid classification. *FEMS Microbiol Rev* 33: 657–687. PMID: [19396961](https://pubmed.ncbi.nlm.nih.gov/19396961/)
25. Marchler-Bauer A, Derbyshire MK, Gonzales NR, Lu S, Chitsaz F, Geer LY, Geer RC, He J, Gwadz M, Hurwitz DI, Lanczycki CJ, Lu F, Marchler GH, Song JS, Thanki N, Wang Z, Yamashita RA, Zhang D, Zheng C, Bryant SH (2015) CDD: NCBI's conserved domain database. *Nucleic Acids Res* 43: D222–D226. gku1221 [pii]. doi: [10.1093/nar/gku1221](https://doi.org/10.1093/nar/gku1221) PMID: [25414356](https://pubmed.ncbi.nlm.nih.gov/25414356/)
26. Chandler M, De la Cruz F, Dyda F, Hickman AB, Moncalian G, Ton-Hoang B (2013) Breaking and joining single-stranded DNA: the HUH endonuclease superfamily. *Nat Rev Microbiol* 11: 525–538. nrmi-cro3067 [pii]. doi: [10.1038/nrmicro3067](https://doi.org/10.1038/nrmicro3067) PMID: [23832240](https://pubmed.ncbi.nlm.nih.gov/23832240/)
27. Bailey TL, Elkan C (1994) Fitting a mixture model by expectation maximization to discover motifs in biopolymers. *Proc Int Conf Intell Syst Mol Biol* 2: 28–36. PMID: [7584402](https://pubmed.ncbi.nlm.nih.gov/7584402/)
28. Aguado-Urda M, Gibello A, Blanco MM, Lopez-Campos GH, Cutuli MT, Fernandez-Garayzabal JF (2012) Characterization of plasmids in a human clinical strain of *Lactococcus garvieae*. *PLoS One* 7: e40119. PONE-D-12-03972 [pii]. doi: [10.1371/journal.pone.0040119](https://doi.org/10.1371/journal.pone.0040119) PMID: [22768237](https://pubmed.ncbi.nlm.nih.gov/22768237/)
29. Chan GF, Gan HM, Rashid NA (2012) Genome sequence of *Enterococcus* sp. strain C1, an azo dye decolorizer. *J Bacteriol* 194: 5716–5717. 194/20/5716 [pii]. doi: [10.1128/JB.01372-12](https://doi.org/10.1128/JB.01372-12) PMID: [23012290](https://pubmed.ncbi.nlm.nih.gov/23012290/)
30. Tomita H, Ike Y (2005) Genetic analysis of transfer-related regions of the vancomycin resistance *Enterococcus* conjugative plasmid pHTbeta: identification of *oriT* and a putative relaxase gene. *J Bacteriol* 187: 7727–7737. 187/22/7727 [pii]. doi: [10.1128/JB.187.22.7727-7737.2005](https://doi.org/10.1128/JB.187.22.7727-7737.2005) PMID: [16267297](https://pubmed.ncbi.nlm.nih.gov/16267297/)
31. Fogg JM, Randall GL, Pettitt BM, Sumners de WL, Harris SA, Zechiedrich L (2012) Bullied no more: when and how DNA shoves proteins around. *Q Rev Biophys* 45: 257–299. S0033583512000054 [pii]. doi: [10.1017/S0033583512000054](https://doi.org/10.1017/S0033583512000054) PMID: [22850561](https://pubmed.ncbi.nlm.nih.gov/22850561/)
32. Gimenes F, Takeda KI, Fiorini A, Gouveia FS, Fernandez MA (2008) Intrinsically bent DNA in replication origins and gene promoters. *Genet Mol Res* 7: 549–558. gmr461 [pii]. PMID: [18752180](https://pubmed.ncbi.nlm.nih.gov/18752180/)
33. Koo HS, Wu HM, Crothers DM (1986) DNA bending at adenine. thymine tracts. *Nature* 320: 501–506. doi: [10.1038/320501a0](https://doi.org/10.1038/320501a0) PMID: [3960133](https://pubmed.ncbi.nlm.nih.gov/3960133/)
34. Lorenzo-Diaz F, Espinosa M (2009) Lagging-strand DNA replication origins are required for conjugal transfer of the promiscuous plasmid pMV158. *J Bacteriol* 191: 720–727. JB.01257-08 [pii]. doi: [10.1128/JB.01257-08](https://doi.org/10.1128/JB.01257-08) PMID: [19028894](https://pubmed.ncbi.nlm.nih.gov/19028894/)
35. Ruiz-Barba JL, Floriano B, Maldonado-Barragan A, Jimenez-Diaz R (2007) Molecular analysis of the 21-kb bacteriocin-encoding plasmid pEF1 from *Enterococcus faecium* 6T1a. *Plasmid* 57: 175–181. S0147-619X(06)00062-X [pii]. doi: [10.1016/j.plasmid.2006.06.003](https://doi.org/10.1016/j.plasmid.2006.06.003) PMID: [16893567](https://pubmed.ncbi.nlm.nih.gov/16893567/)
36. Schroeder BO, Backhed F (2016) Signals from the gut microbiota to distant organs in physiology and disease. *Nat Med* 22: 1079–1089. nm.4185 [pii]. doi: [10.1038/nm.4185](https://doi.org/10.1038/nm.4185) PMID: [27711063](https://pubmed.ncbi.nlm.nih.gov/27711063/)
37. Jakobsson HE, Jernberg C, Andersson AF, Sjolund-Karlsson M, Jansson JK, Engstrand L (2010) Short-term antibiotic treatment has differing long-term impacts on the human throat and gut microbiome. *PLoS One* 5: e9836. doi: [10.1371/journal.pone.0009836](https://doi.org/10.1371/journal.pone.0009836) PMID: [20352091](https://pubmed.ncbi.nlm.nih.gov/20352091/)
38. Nash RP, McNamara DE, Ballentine WK, III, Matson SW, Redinbo MR (2012) Investigating the impact of bisphosphonates and structurally related compounds on bacteria containing conjugative plasmids. *Biochem Biophys Res Commun* 424: 697–703. S0006-291X(12)01295-8 [pii]. doi: [10.1016/j.bbrc.2012.07.012](https://doi.org/10.1016/j.bbrc.2012.07.012) PMID: [22796221](https://pubmed.ncbi.nlm.nih.gov/22796221/)
39. Sambrook J., Fritsch E. F., and Maniatis T. (1989) *Molecular cloning: a laboratory manual*. Cold Spring Harbor, New York: Cold Spring Harbor Laboratory Press.
40. Bron S, Peijnenburg A, Peeters BPH, Haima P, Venema G (1989) Cloning and plasmid (in)stability in *Bacillus subtilis*. In: Butler LO, Harwood CR, Moseley BEB, editors. *Genetic transformation and expression*. Andover, UK: Intercept Ltd. pp. 205–219.

41. Singh PK, Ramachandran G, Duran-Alcalde L, Alonso C, Wu LJ, Meijer WJ (2012) Inhibition of *Bacillus subtilis* natural competence by a native, conjugative plasmid-encoded *comK* repressor protein. *Environ Microbiol* 14: 2812–2825. doi: [10.1111/j.1462-2920.2012.02819.x](https://doi.org/10.1111/j.1462-2920.2012.02819.x) PMID: [22779408](https://pubmed.ncbi.nlm.nih.gov/22779408/)
42. Schuck P (2000) Size-distribution analysis of macromolecules by sedimentation velocity ultracentrifugation and lamm equation modeling. *Biophys J* 78: 1606–1609. doi: [10.1016/S0006-3495\(00\)76713-0](https://doi.org/10.1016/S0006-3495(00)76713-0) PMID: [10692345](https://pubmed.ncbi.nlm.nih.gov/10692345/)
43. Laue TM, Shah BD, Ridgeway TM, Pelletier SL (1992) Interpretation of analytical sedimentation data for proteins. In: Harding SE, Rowe AJ, Horton JC, editors. *Analytical ultracentrifugation in biochemistry and polymer science*. Cambridge, UK: Royal Society of Chemistry. pp. 90–125.
44. Cole JL (2004) Analysis of heterogeneous interactions. *Methods Enzymol* 384: 212–232. doi: [10.1016/S0076-6879\(04\)84013-8](https://doi.org/10.1016/S0076-6879(04)84013-8) PMID: [15081689](https://pubmed.ncbi.nlm.nih.gov/15081689/)
45. Svedberg T. and Pedersen K. O. (1940) *The Ultracentrifuge*. Oxford: Clarendon Press.
46. Goodsell DS, Dickerson RE (1994) Bending and curvature calculations in B-DNA. *Nucleic Acids Res* 22: 5497–5503. PMID: [7816643](https://pubmed.ncbi.nlm.nih.gov/7816643/)
47. Altschul SF, Madden TL, Schaffer AA, Zhang J, Zhang Z, Miller W, Lipman DJ (1997) Gapped BLAST and PSI-BLAST: a new generation of protein database search programs. *Nucleic Acids Res* 25: 3389–3402. gka562 [pii]. PMID: [9254694](https://pubmed.ncbi.nlm.nih.gov/9254694/)
48. Schaffer AA, Aravind L, Madden TL, Shavirin S, Spouge JL, Wolf YI, Koonin EV, Altschul SF (2001) Improving the accuracy of PSI-BLAST protein database searches with composition-based statistics and other refinements. *Nucleic Acids Res* 29: 2994–3005. PMID: [11452024](https://pubmed.ncbi.nlm.nih.gov/11452024/)
49. Altschul SF, Wootton JC, Gertz EM, Agarwala R, Morgulis A, Schaffer AA, Yu YK (2005) Protein database searches using compositionally adjusted substitution matrices. *FEBS J* 272: 5101–5109. EJB4945 [pii]. doi: [10.1111/j.1742-4658.2005.04945.x](https://doi.org/10.1111/j.1742-4658.2005.04945.x) PMID: [16218944](https://pubmed.ncbi.nlm.nih.gov/16218944/)
50. Edgar RC (2010) Search and clustering orders of magnitude faster than BLAST. *Bioinformatics* 26: 2460–2461. btq461 [pii]. doi: [10.1093/bioinformatics/btq461](https://doi.org/10.1093/bioinformatics/btq461) PMID: [20709691](https://pubmed.ncbi.nlm.nih.gov/20709691/)
51. Bailey TL, Gribskov M (1998) Combining evidence using p-values: application to sequence homology searches. *Bioinformatics* 14: 48–54. btb036 [pii]. PMID: [9520501](https://pubmed.ncbi.nlm.nih.gov/9520501/)
52. Tamura K, Stecher G, Peterson D, Filipksi A, Kumar S (2013) MEGA6: Molecular Evolutionary Genetics Analysis version 6.0. *Mol Biol Evol* 30: 2725–2729. mst197 [pii]. doi: [10.1093/molbev/mst197](https://doi.org/10.1093/molbev/mst197) PMID: [24132122](https://pubmed.ncbi.nlm.nih.gov/24132122/)
